# Supplementary material for: Arachidonic acid suppresses hepatic cell growth through ROS‐mediated activation of transglutaminase
Source: PubMed Central journal article supplement (PMC6168684; doi:10.1002/2211-5463.12511), 2018-09-11
Supplement: FEB4-8-1703-s001.pdf [file FEB4-8-1703-s001.pdf]

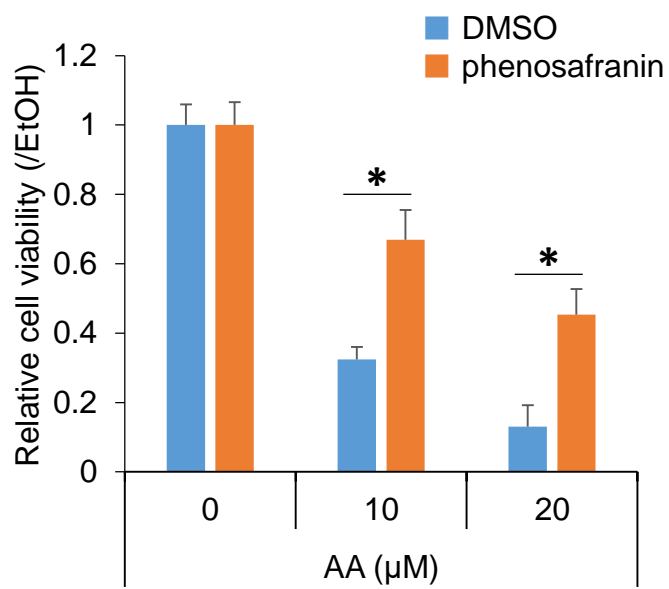

**Fig S1**

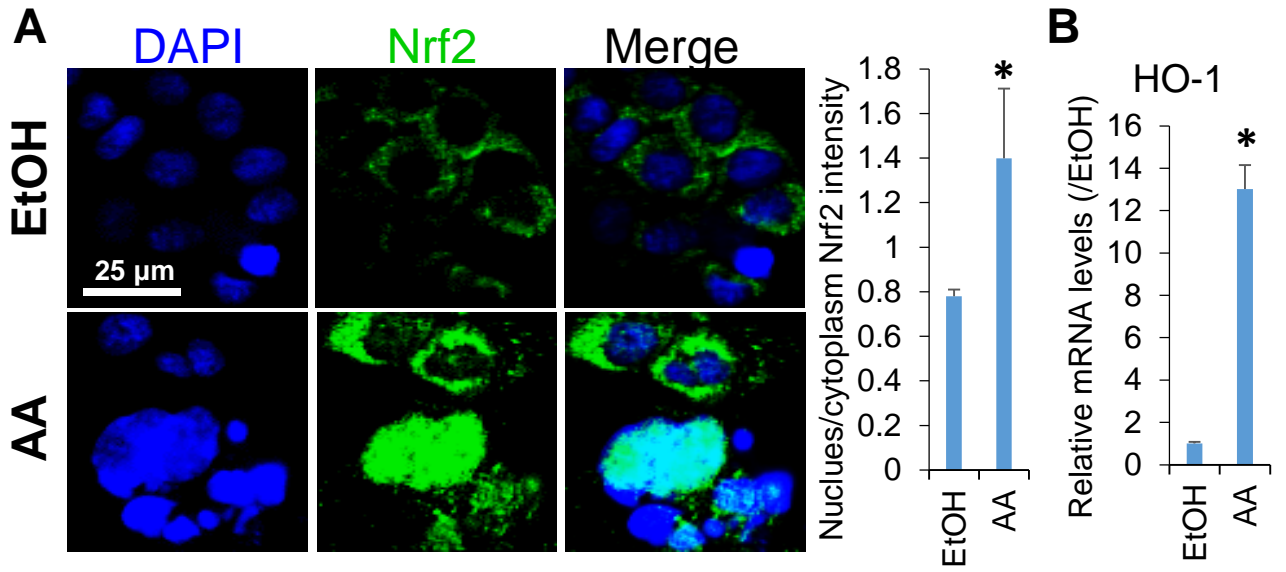

**Fig S2**
